# Supplementary material
Source: PubMed Central journal article supplement (PMC7056509)
Supplement: NIHMS1539268-supplement-2.pdf [file NIHMS1539268-supplement-2.pdf]

## Cannabinoid Exposure via Lactation in Rats Disrupts Perinatal Programming of the Gamma-Aminobutyric Acid Trajectory and Select Early-life Behaviors

### Supplemental Information

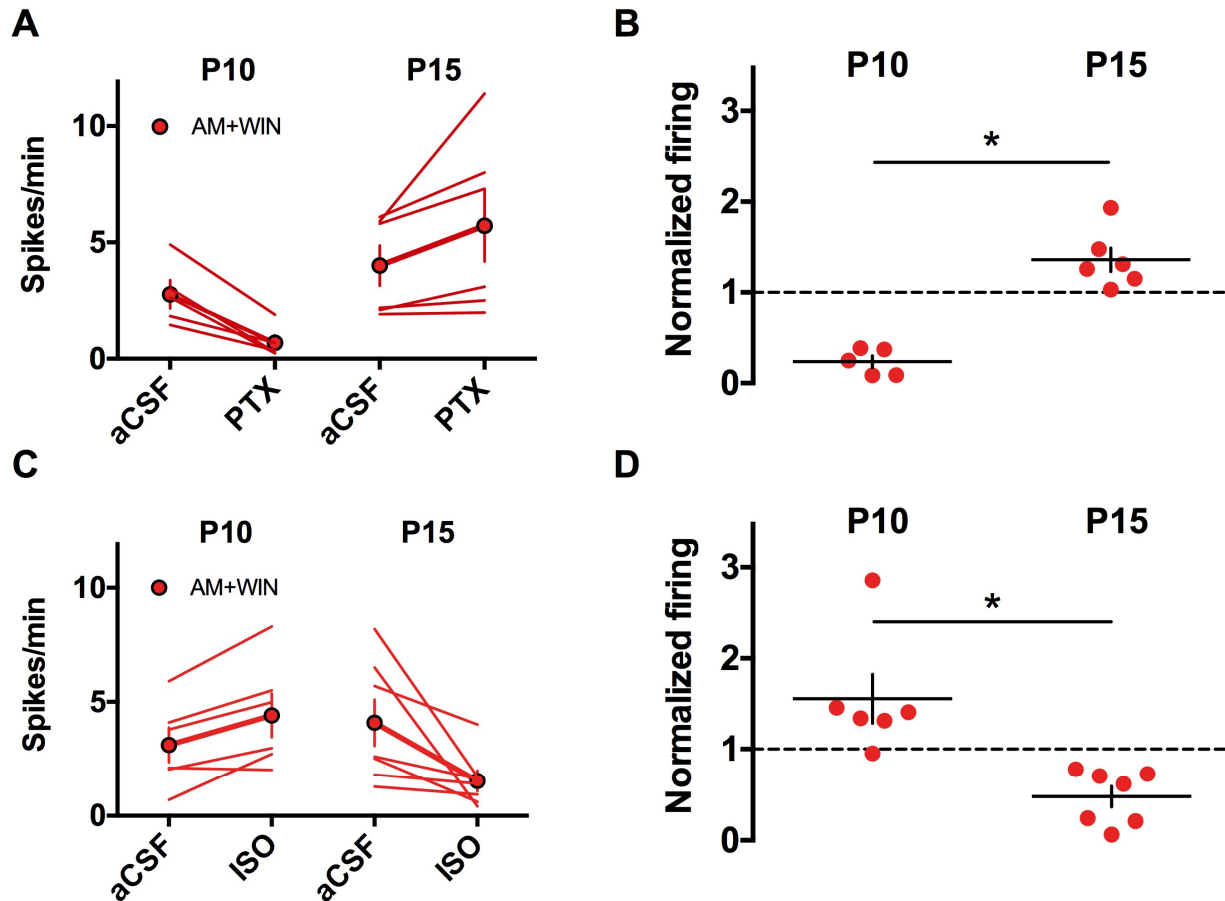

**Supplementary Figure S1: The delayed excitatory/inhibitory switch in progeny of dams exposed to WIN is mediated by CB1R.** Action potentials were recorded in cell-attached (I=0) layer 5 pyramidal neurons in standard aCSF. After 10 min of baseline recording, picrotoxin (20  $\mu$ M; GABA-A receptor antagonist, PTX) or isoguvacine (7  $\mu$ M; GABA-A receptor agonist, ISO) was bath-applied. Spiking activity was calculated as an average of spikes per minute (10 min baseline) compared to the last 10 min of drug application. AM251 co-administration prevents the delayed GABA shift induced by perinatal WIN treatment. **A, B:** GABA-A receptor antagonism is inhibitory at P09-10 in AM+WIN-exposed rats. At P09-10, PTX decreased spike frequency in slices obtained from AM+WIN rats (N=5 cells/3 rats). At P15-16 however, PTX increased spike frequency in AM+WIN-exposed progeny (N=6 cells/4 rats). \*P<0.0001, Student's t-test with Welch's correction. **C, D:** At P09-10, ISO application increased spike frequency in AM+WIN (N=6 cells/4 rats) rats. Conversely, at P15-16 ISO application decreased spiking in slices obtained from AM+WIN-exposed rats (N=7 cells/4 rats). \*P=0.0084, Student's t-test with Welch's correction. Example traces shown in supplementary Figure S7.

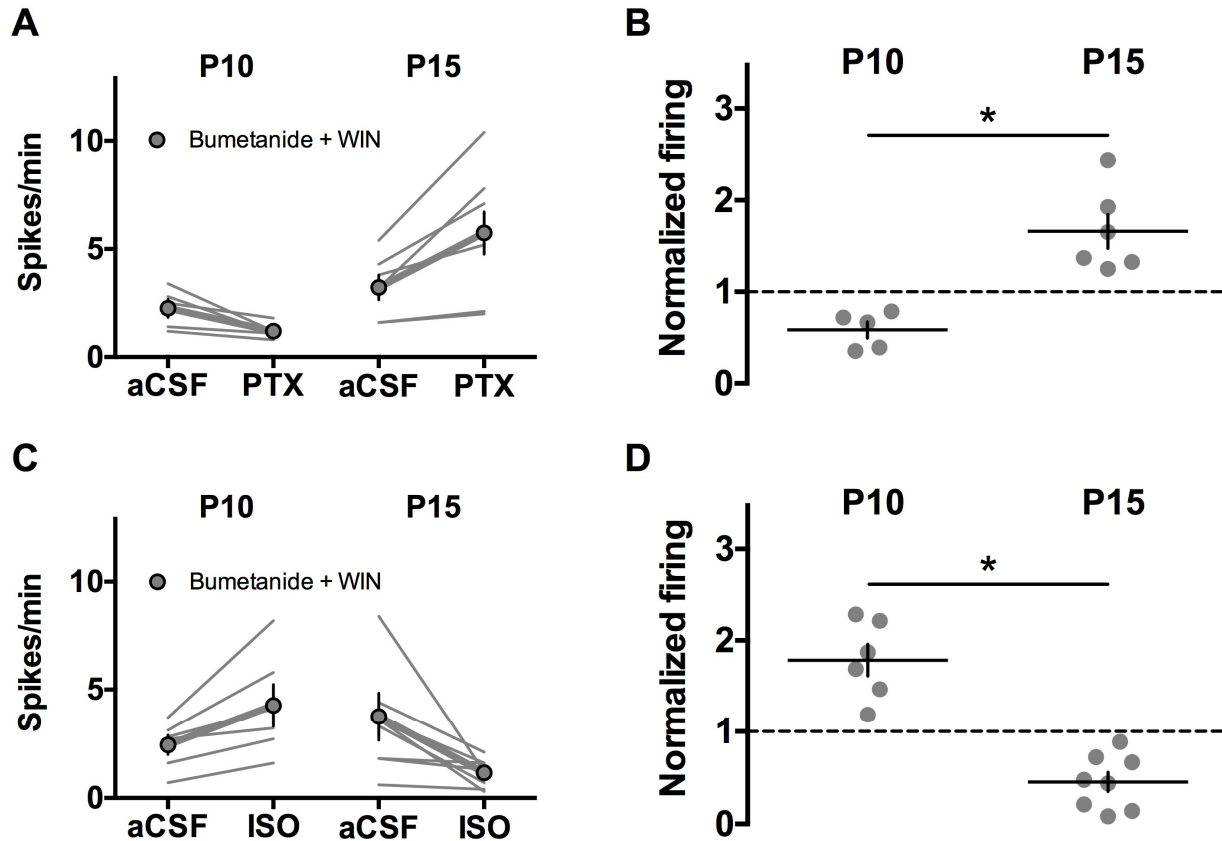

**Supplementary Figure S2: The delayed excitatory/inhibitory switch in progeny of dams exposed to WIN is prevented by perinatal (P1-P15) bumetanide treatment.** Action potentials were recorded in cell-attached ( $I=0$ ) layer 5 pyramidal neurons in standard aCSF. After 10 min of baseline recording, picrotoxin ( $20 \mu\text{M}$ ; GABA-A receptor antagonist, PTX) or isoguvacine ( $7 \mu\text{M}$ ; GABA-A receptor agonist, ISO) was bath-applied. Spiking activity was calculated as an average of spikes per minute (10 min baseline) compared to the last 10 min of drug application. **A, B:** GABA-A receptor antagonism is inhibitory at P09-10 in WIN+bumetanide, but excitatory at P15-16. At P09-10, PTX decreased spike frequency in slices obtained from WIN+bumetanide rats ( $N=5$  cells/3 rats). Conversely, at P15-16 PTX decreased spike frequency in WIN+bumetanide-exposed progeny ( $N=6$  cells/4 rats). \* $P=0.0012$ , Student's t-test with Welch's correction,  $P=0.0156$ . **C, D:** At P09-10, ISO application increased spike frequency in WIN+bumetanide rats ( $N=6$  cells/4 rats). However, at P15-16 ISO application increased spike frequency in slices obtained from WIN+bumetanide exposed progeny ( $N=8$  cells/6 rats). \* $P=0.0001$ , Student's t-test with Welch's correction.

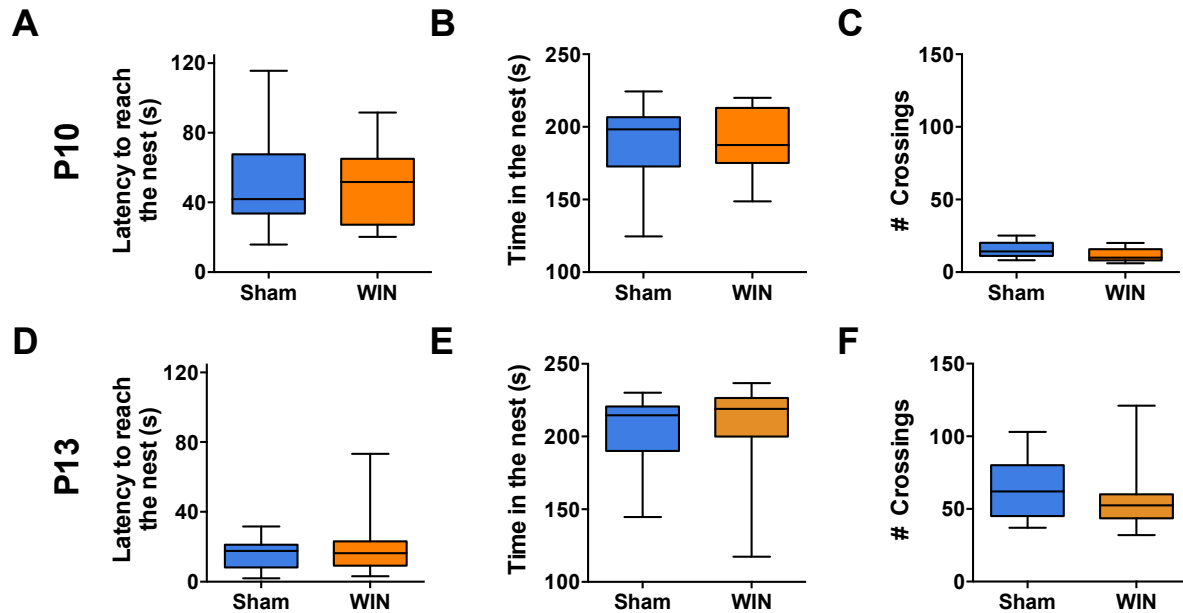

**Supplementary Figure S3: Homing behavior is unaffected in pups exposed to WIN during the lactation period.** **a:** The latency to reach the nest in the homing apparatus does not differ between pups from Sham- or WIN-treated dams at P10 ( $P=0.8754$ , Mann-Whitney) or P13 ( $P=0.8707$ , Mann-Whitney). **b:** Similarly, no significant difference was found for the total time spent in the nest between pups from Sham- or WIN-treated dams at P10 ( $P=0.8411$ , Mann-Whitney) or P13 ( $P=0.2318$ , Mann-Whitney). **c:** Finally, no difference was found in the total number of crossings made during the test by pups from Sham- vs WIN-treated dams at P10 ( $P=0.0586$ , Mann-Whitney) or P13 ( $P=0.1364$ , Mann-Whitney). P10: Sham,  $N=11$  pups/4 litters; WIN,  $N=14$  pups/3 litters. P13: Sham,  $N=21$  pups/2 litters; WIN,  $N=22$  pups/2 litters). Data are shown as median with interquartile ranges and minimal to maximal values.

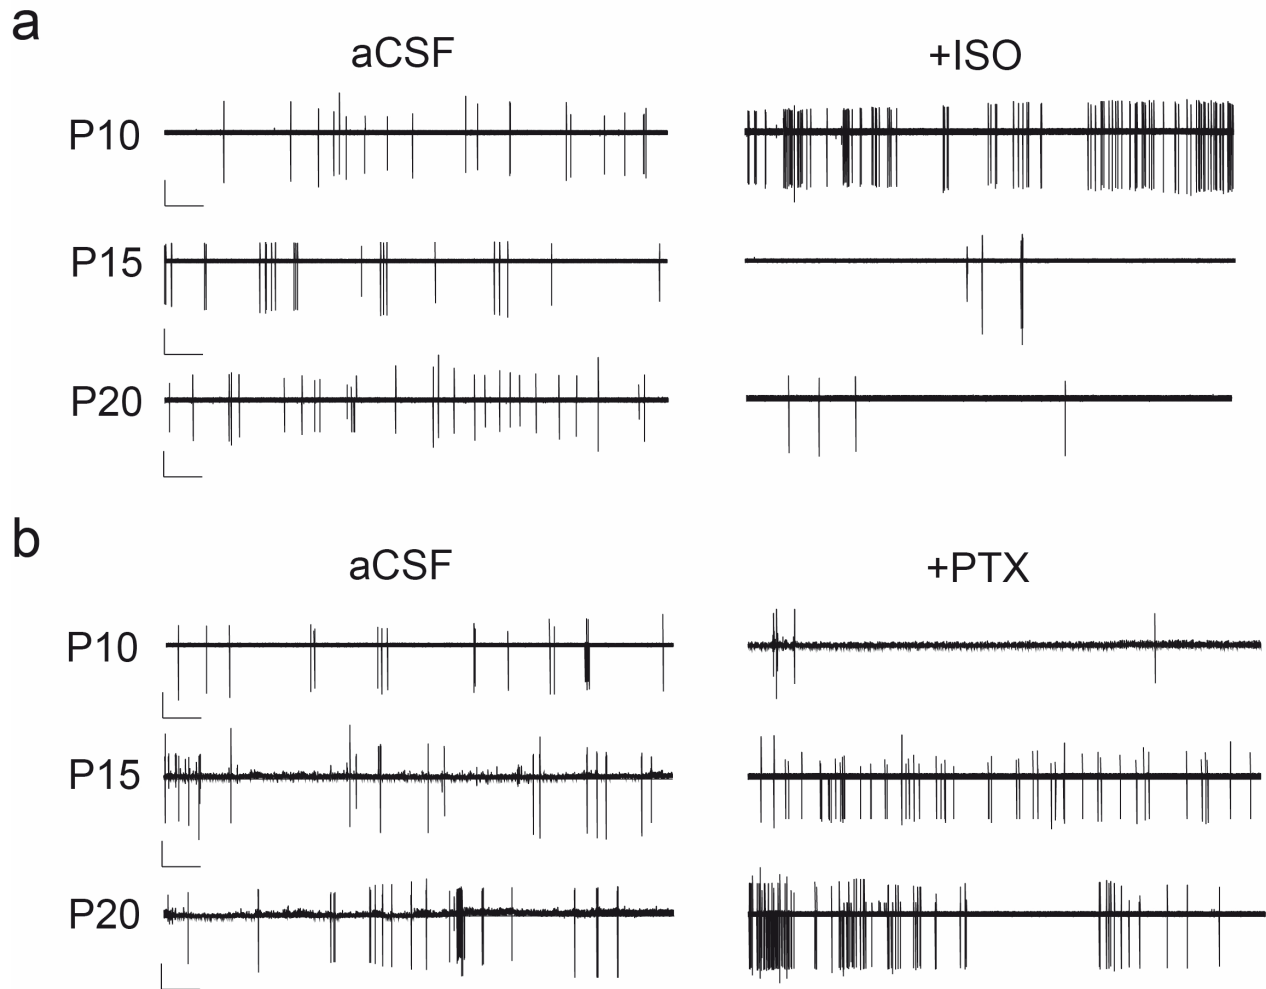

**Supplementary Figure S4: Example traces for cell-attached recordings in Figure 1 (Sham recordings). Scale bars represent 50pA x 1min.**

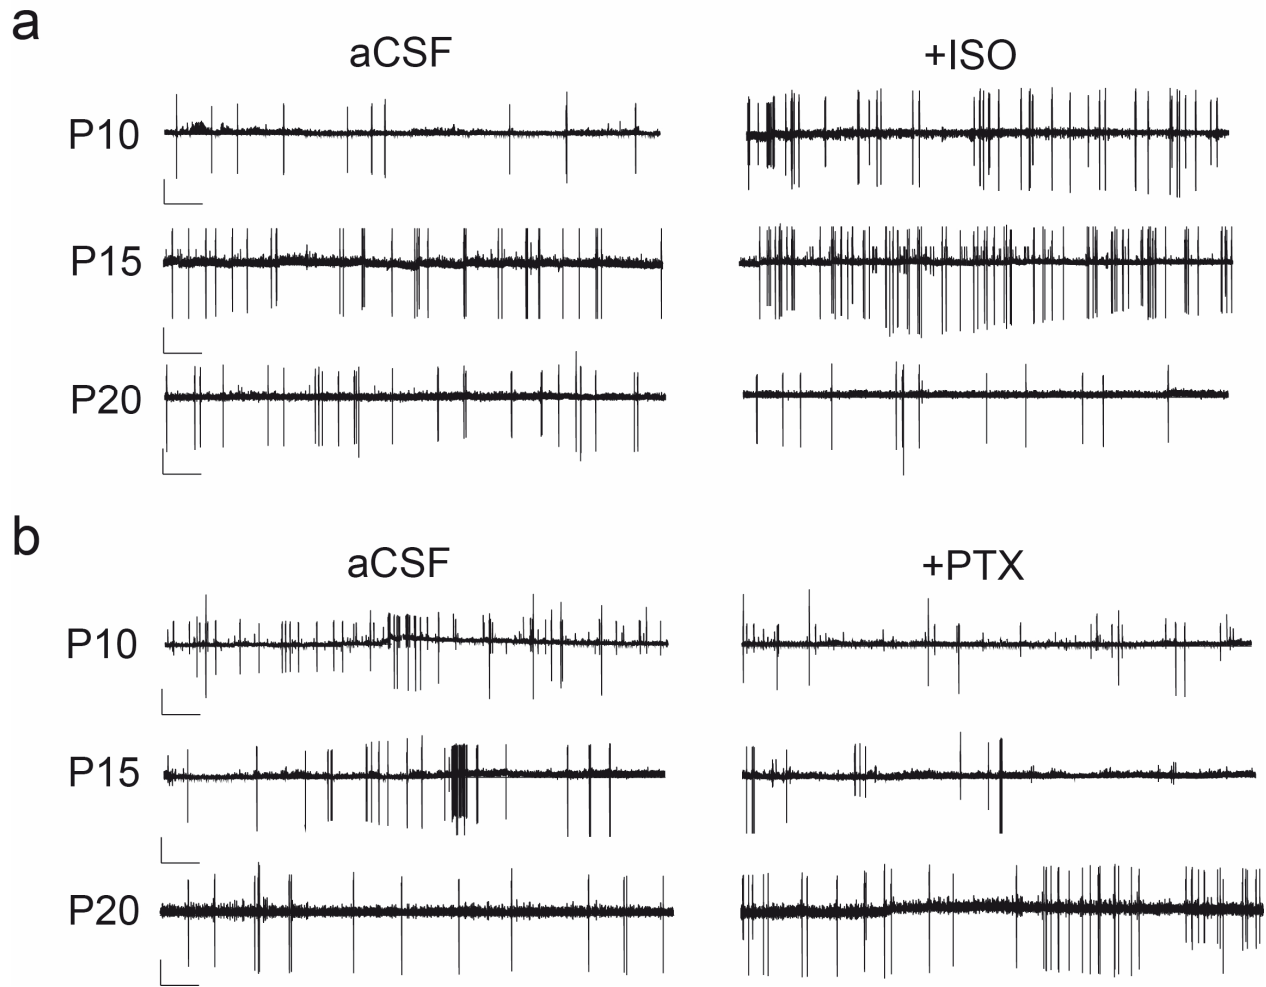

**Supplementary Figure S5: Example traces for cell-attached recordings in Figure 2 (WIN recordings). Scale bars represent 50pA x 1min.**

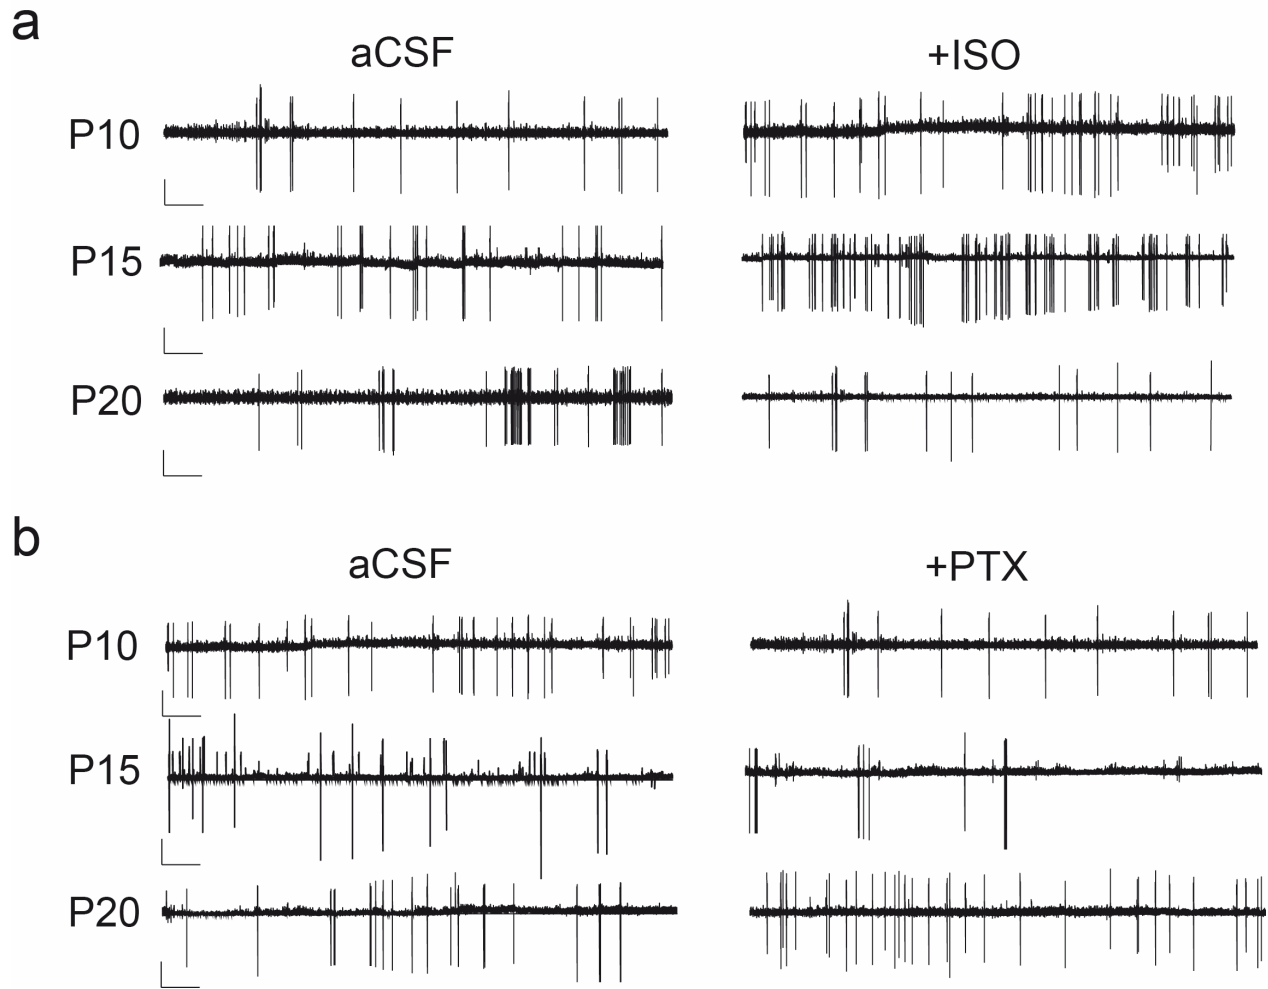

**Supplementary Figure S6: Example traces for cell-attached recordings in Figure 2 (THC). Scale bars represent 50pA x 1min.**

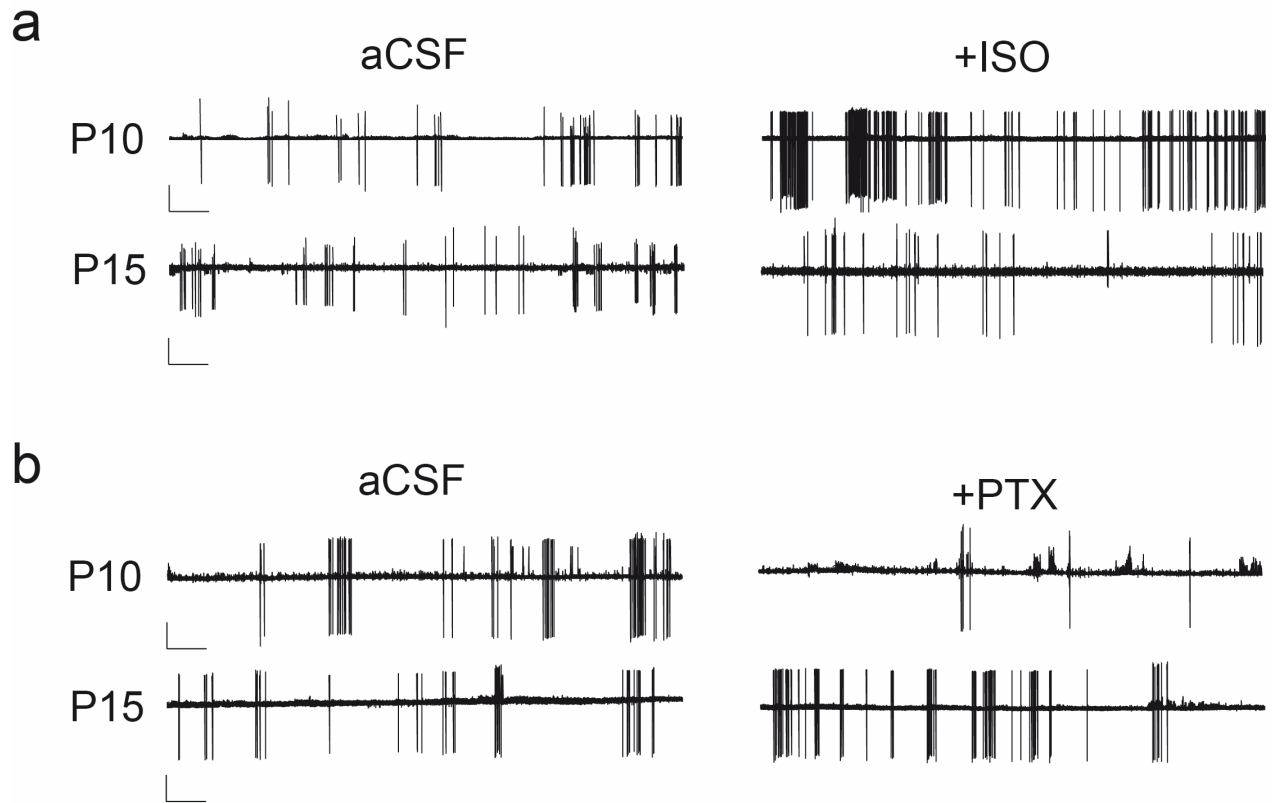

**Supplementary Figure S7: Example traces for cell-attached recordings in Figure 3 (AM+WIN).**  
Scale bars represent 50pA x 1min.

| <b>KCC2/GAPDH</b>    | <b>P10</b>         | <b>P15</b>         | <b>P21</b>         |
|----------------------|--------------------|--------------------|--------------------|
| Male Sham            | N=4<br>1.227       | N=4<br>3.033       | N=4<br>4.098       |
| Female Sham          | N=4<br>1.164       | N=4<br>3.805       | N=4<br>4.581       |
| Student's T-test (P) | M vs F<br>P=0.8114 | M vs F<br>P=0.4325 | M vs F<br>P=0.2321 |
| Male WIN             | N=3<br>1.363       | N=4<br>2.011       | N=5<br>2.977       |
| Female WIN           | N=3<br>1.409       | N=4<br>2.679       | N=5<br>3.315       |
| Student's T-Test (P) | M vs F<br>P=0.9382 | M vs F<br>P=0.3912 | M vs F<br>P=0.3296 |

| <b>NKCC1/GAPDH</b>   | <b>P10</b>         | <b>P15</b>         | <b>P21</b>         |
|----------------------|--------------------|--------------------|--------------------|
| Male Sham            | N=4<br>1.000       | N=4<br>0.983       | N=4<br>1.000       |
| Female Sham          | N=4<br>1.000       | N=4<br>1.022       | N=4<br>0.999       |
| Student's T-test (P) | M vs F<br>P>0.9999 | M vs F<br>P=0.6065 | M vs F<br>P>0.9999 |
| Male WIN             | N=3<br>0.941       | N=4<br>0.917       | N=5<br>0.989       |
| Female WIN           | N=3<br>0.904       | N=4<br>0.872       | N=5<br>0.877       |
| Student's T-Test (P) | M vs F<br>P=0.6885 | M vs F<br>P=0.6912 | M vs F<br>P=0.1990 |

**Supplementary Table S1: Sex-distribution of KCC2 and NKCC1 Western Blot analyses.** Samples used in Western blot analyses were collected from both male and female rats at all ages. Values for individual groups are expressed as rats (N) and protein/GAPDH outcomes. No significant differences were found between sexes within treatment groups at any of the tested ages for either KCC2 or NKCC1.



| <b>KCC2<br/>fold-change</b> | <b>P10</b>         | <b>P15</b>         | <b>P21</b>         |
|-----------------------------|--------------------|--------------------|--------------------|
| Male<br>Sham                | N=6<br>1.097       | N=5<br>1.665       | N=5<br>1.662       |
| Female<br>Sham              | N=5<br>1.233       | N=4<br>1.516       | N=5<br>1.667       |
| Student's<br>T-test (P)     | M vs F<br>P=0.2981 | M vs F<br>P=0.2873 | M vs F<br>P=0.9685 |
| Male<br>WIN                 | N=6<br>1.158       | N=7<br>1.671       | N=5<br>1.541       |
| Female<br>WIN               | N=4<br>1.153       | N=4<br>1.602       | N=5<br>1.652       |
| Student's<br>T-Test (P)     | M vs F<br>P=0.9837 | M vs F<br>P=0.8342 | M vs F<br>P=0.5731 |

**Supplementary Table S2: Sex-distribution of qPCR data.** Samples used in qPCR data were collected from both male and female rats at all ages. Values for individual groups are expressed as rats (N) and KCC2 fold-change. No significant differences were found between sexes within treatment groups responding to either ISO or PTX in slice conditions.

| Behavior             | Parameter          | Treatment  | Sex    | n    | Mean   | SEM  | P value (unpaired t test) |
|----------------------|--------------------|------------|--------|------|--------|------|---------------------------|
| USV                  | Dominant frequency | Sham P09   | Male   | 21   | 39.59  | 0.44 | 0.7497                    |
|                      |                    | Sham P15   |        | 6    | 42.09  | 0.89 | 0.8166                    |
|                      |                    | Sham P09   | Female | 14   | 39.34  | 0.53 |                           |
|                      |                    | Sham P15   |        | 4    | 41.73  | 1.12 |                           |
|                      |                    | WIN P09    | Male   | 13   | 41.84  | 0.47 | 0.7093                    |
|                      |                    | WIN P15    |        | 8    | 38.59  | 0.84 | 0.3368                    |
|                      |                    | WIN P09    | Female | 18   | 42.08  | 0.41 |                           |
|                      |                    | WIN P15    |        | 6    | 38.52  | 0.65 |                           |
|                      |                    | THC P09    | Male   | 19   | 42.22  | 0.50 | 0.8882                    |
|                      |                    | THC P15    |        | 5    | 39.05  | 1.16 | 0.9648                    |
|                      |                    | THC P09    | Female | 17   | 42.12  | 0.58 |                           |
|                      |                    | THC P15    |        | 5    | 39.11  | 0.70 |                           |
|                      |                    | AM+WIN P09 | Male   | 9    | 39.01  | 0.30 | 0.8396                    |
|                      |                    | AM+WIN P09 | Female | 7    | 39.16  | 0.75 |                           |
| Bumetanide P09       | Male               | 3          | 41.26  | 2.38 | 0.9898 |      |                           |
| Bumetanide P09       | Female             | 3          | 41.22  | 0.57 |        |      |                           |
| Bumetanide + WIN P09 | Male               | 9          | 40.46  | 0.84 | 0.7482 |      |                           |
| Bumetanide + WIN P09 | Female             | 6          | 40.97  | 1.41 |        |      |                           |

**Supplementary Table S3: Sex-distribution of USV data.** Samples used in USV data were collected from both male and female rats at all ages. Values for individual groups are expressed as rats (N) and dominant frequency. No significant differences were found between sexes within treatment groups.

| Behavior | Parameter        | Treatment | Sex    | n  | Mean  | SEM   | P value (unpaired t test) |
|----------|------------------|-----------|--------|----|-------|-------|---------------------------|
| Homing   | Latency (s)      | Sham P10  | Male   | 10 | 15.67 | 2.867 | 0.9421                    |
|          |                  | Sham P13  |        | 4  | 64.24 | 18.76 | 0.3337                    |
|          |                  | Sham P10  | Female | 11 | 15.39 | 2.510 |                           |
|          |                  | Sham P13  |        | 7  | 42.17 | 6.785 |                           |
| Homing   | Time in nest (s) | WIN P10   | Male   | 10 | 11.33 | 2.179 | 0.0622                    |
|          |                  | WIN P13   |        | 8  | 37.65 | 5.808 | 0.0090                    |
|          |                  | WIN P10   | Female | 10 | 18.01 | 2.551 |                           |
|          |                  | WIN P13   |        | 6  | 65.23 | 6.515 |                           |
| Homing   | Crossings        | Sham P10  | Male   | 10 | 62.70 | 7.025 | 0.6989                    |
|          |                  | Sham P13  |        | 4  | 11.50 | 1.936 | 0.0638                    |
|          |                  | Sham P10  | Female | 10 | 66.09 | 4.984 |                           |
|          |                  | Sham P13  |        | 7  | 17.29 | 1.848 |                           |
| Homing   | Crossings        | WIN P10   | Male   | 10 | 51.30 | 3.232 | 0.2261                    |
|          |                  | WIN P13   |        | 8  | 11.63 | 1.762 | 0.8571                    |
|          |                  | WIN P10   | Female | 10 | 62.80 | 8.396 |                           |
|          |                  | WIN P13   |        | 6  | 11.17 | 1.759 |                           |

**Supplementary Table S4: Sex-distribution of homing data.** Samples used in homing data were collected from both male and female rats at all ages. Values for individual groups are expressed as rats (N) and units (seconds for latency and time in nest or centimeters for distance travelled).

## Supplementary Methods

Electrophysiology slice-preparation and acquisition: rats were anesthetized with isoflurane and 300  $\mu\text{m}$ -thick coronal slices were prepared in a sucrose-based solution (in mM: 87 NaCl, 75 sucrose, 25 glucose, 2.5 KCl, 4 MgCl<sub>2</sub>, 0.5 CaCl<sub>2</sub>, 23 NaHCO<sub>3</sub> and 1.25 NaH<sub>2</sub>PO<sub>4</sub>) at 4°C using an Integraslice vibratome (Campden Instruments). Slices were stored for one hour at 32°C in artificial cerebrospinal fluid (ACSF; in mM: 130 NaCl, 2.5 KCl, 2.4 MgCl<sub>2</sub>, 1.2 CaCl<sub>2</sub>, 23 NaHCO<sub>3</sub>, 1.2 NaH<sub>2</sub>PO<sub>4</sub> and 11 glucose), equilibrated with 95% O<sub>2</sub>/5% CO<sub>2</sub>. Slices were then stored at room temperature until recording. All experiments were conducted at 30–32°C in ACSF. Cell-attached patch-clamp recordings were made in PFC layer 5, collected using an Axopatch-1D amplifier (Molecular Devices) and acquired with Clampex 10.2 acquisition Software via a Digidata 1440A (Molecular Devices). Pyramidal neurons in PFC layer 5 were visualized using an infrared illuminated upright microscope (Olympus BX51WI). Slices were superfused at 2ml/min with ACSF.

Single-channel pipette solution, in mM: 120 NaCl, 20 TEA-Cl, 5 KCl, 5 4-Aminopyridine, 0.1 CaCl<sub>2</sub>, 10 MgCl<sub>2</sub>, 10 Glucose, 10 HEPES, 0.01 GABA.
